# Supplementary material for: Three New Xanthones from Hypericum scabrum and Their Quorum Sensing Inhibitory Activities against Chromobacterium violaceum
Source: MDPI journal article supplement (doi:10.3390/molecules27175519), 2022-08-27

## Supplementary Material

### Three new xanthonones from *Hypericum scabrum* and their quorum sensing inhibitory activities against *Chromobacterium violaceum*

Li-Ping Teng<sup>1,2,†</sup>, Hong Zeng<sup>1,†</sup>, Cai-Yan Yang<sup>2</sup>, He-Bin Wang<sup>3,\*</sup> and Zhong-Bo Zhou<sup>1,2,\*</sup>

<sup>1</sup> Research Center for the Prevention and Treatment of Drug Resistant Microbial Infecting, Youjiang Medical University for Nationalities, Baise 533000, PR China

<sup>2</sup> School of Pharmacy, Youjiang Medical University for Nationalities, 98 Chengxiang Road, Baise 533000, PR China

<sup>3</sup> College of Chemical Engineering and Technology, Tianshui Normal University, Tianshui, 741000, PR China

\* Correspondence: zzb7855@163.com (Z.-B.Z.); wanghebin@tsnu.edu.cn (H.-B.W.)

† These authors contributed equally to this work.

## List of Figures

**Figure S1**  $^1\text{H}$  NMR (500 MHz, DMSO- $d_6$ ) spectrum of compound **1**

**Figure S2**  $^{13}\text{C}$  NMR (125 MHz, DMSO- $d_6$ ) spectrum of compound **1**

**Figure S3** HRESIMS spectrum of compound **1** **Figure S4** HSQC spectrum of compound **1**

**Figure S5** HMBC spectrum of compound **1**

**Figure S6**  $^1\text{H}$  NMR (500 MHz, DMSO- $d_6$ ) spectrum of compound **2**

**Figure S7**  $^{13}\text{C}$  NMR (125 MHz, DMSO- $d_6$ ) spectrum of compound **2**

**Figure S8** HRESIMS spectrum of compound **2** **Figure S9** HSQC spectrum of compound **2**

**Figure S10** HMBC spectrum of compound **2**

**Figure S11**  $^1\text{H}$  NMR (500 MHz, DMSO- $d_6$ ) spectrum of compound **7**

**Figure S12**  $^{13}\text{C}$  NMR (125 MHz, DMSO- $d_6$ ) spectrum of compound **7**

**Figure S13** HRESIMS spectrum of compound **7**

**Figure S14** HSQC spectrum of compound **7**

**Figure S15** HMBC spectrum of compound **7**

**Figure S16**  $^1\text{H}$  NMR (500 MHz, DMSO- $d_6$ ) spectrum of compound **8**

**Figure S17**  $^{13}\text{C}$  NMR (125 MHz, DMSO- $d_6$ ) spectrum of compound **8**

**Figure S18** HRESIMS spectrum of compound **8**

**Figure S19** HSQC spectrum of compound **8**

**Figure S20** HMBC spectrum of compound **8**

**Figure S1**  $^1\text{H}$  NMR (500 MHz,  $\text{DMSO}-d_6$ ) spectrum of compound **1**

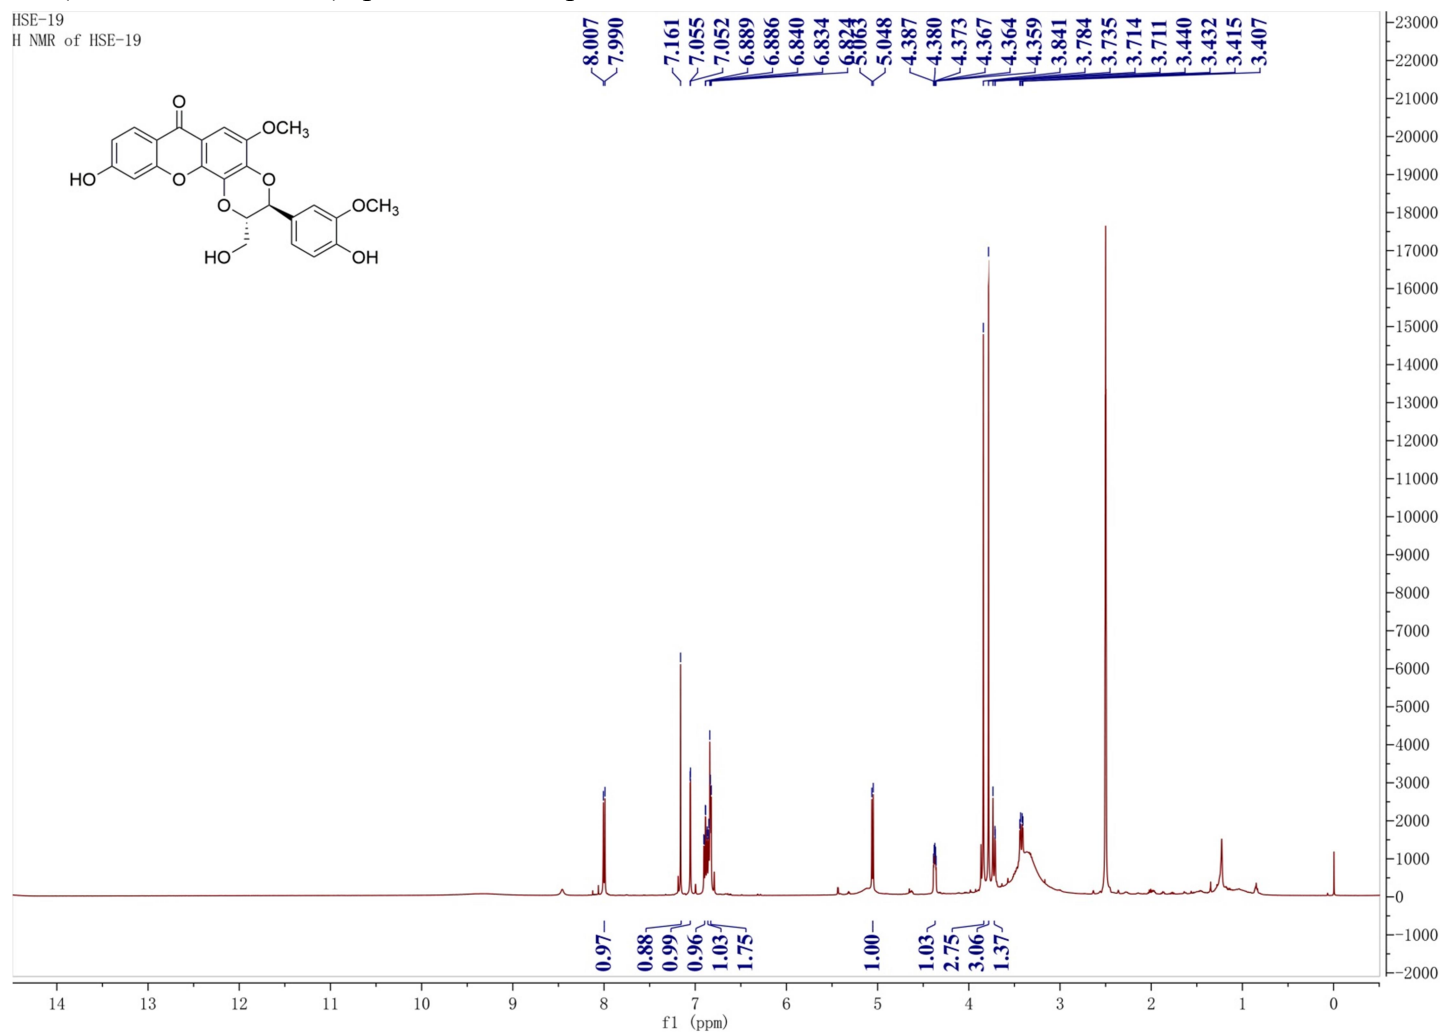

**Figure S2**  $^{13}\text{C}$  NMR (125 MHz,  $\text{DMSO-}d_6$ ) spectrum of compound **1**

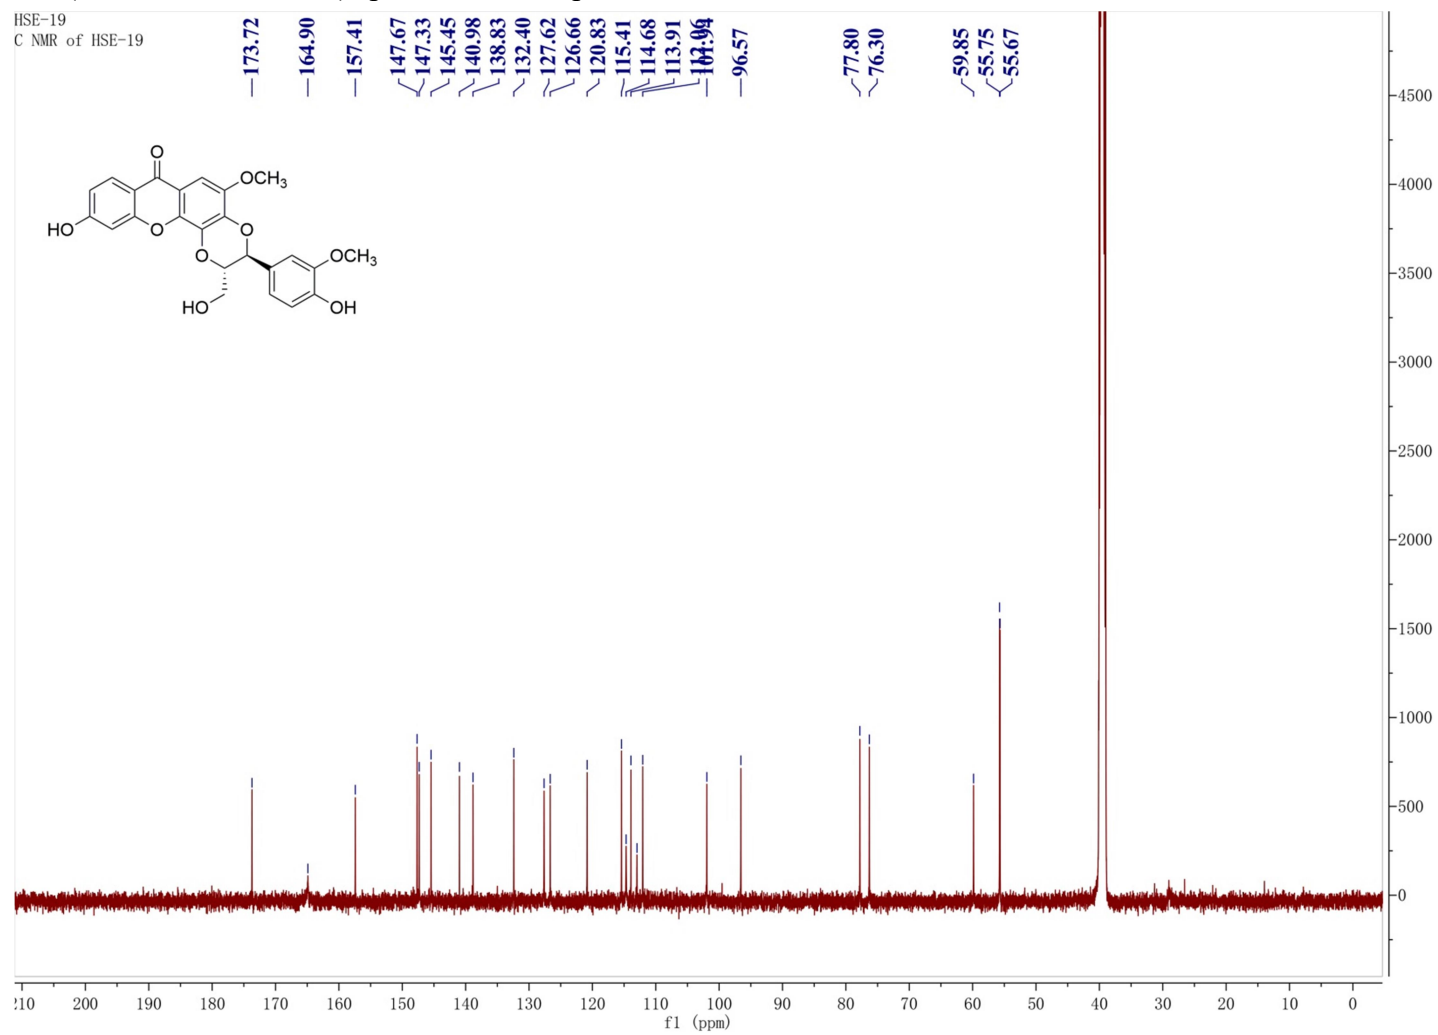



Figure S3 HRESIMS spectrum of compound 1

|                |              |                   |          |
|----------------|--------------|-------------------|----------|
| Analysis Name: | HSE-19-1     | Acquisition Date: | 20201230 |
| Comment:       | ESI Positive | Operator:         | TIPC     |

2 #12 RT: 0.10 AV: 1 SB: 4 0.05-0.06, 0.20-0.21 NL: 7.48E4  
T: FTMS + p ESI Full lock ms [80.0000-1200.0000]

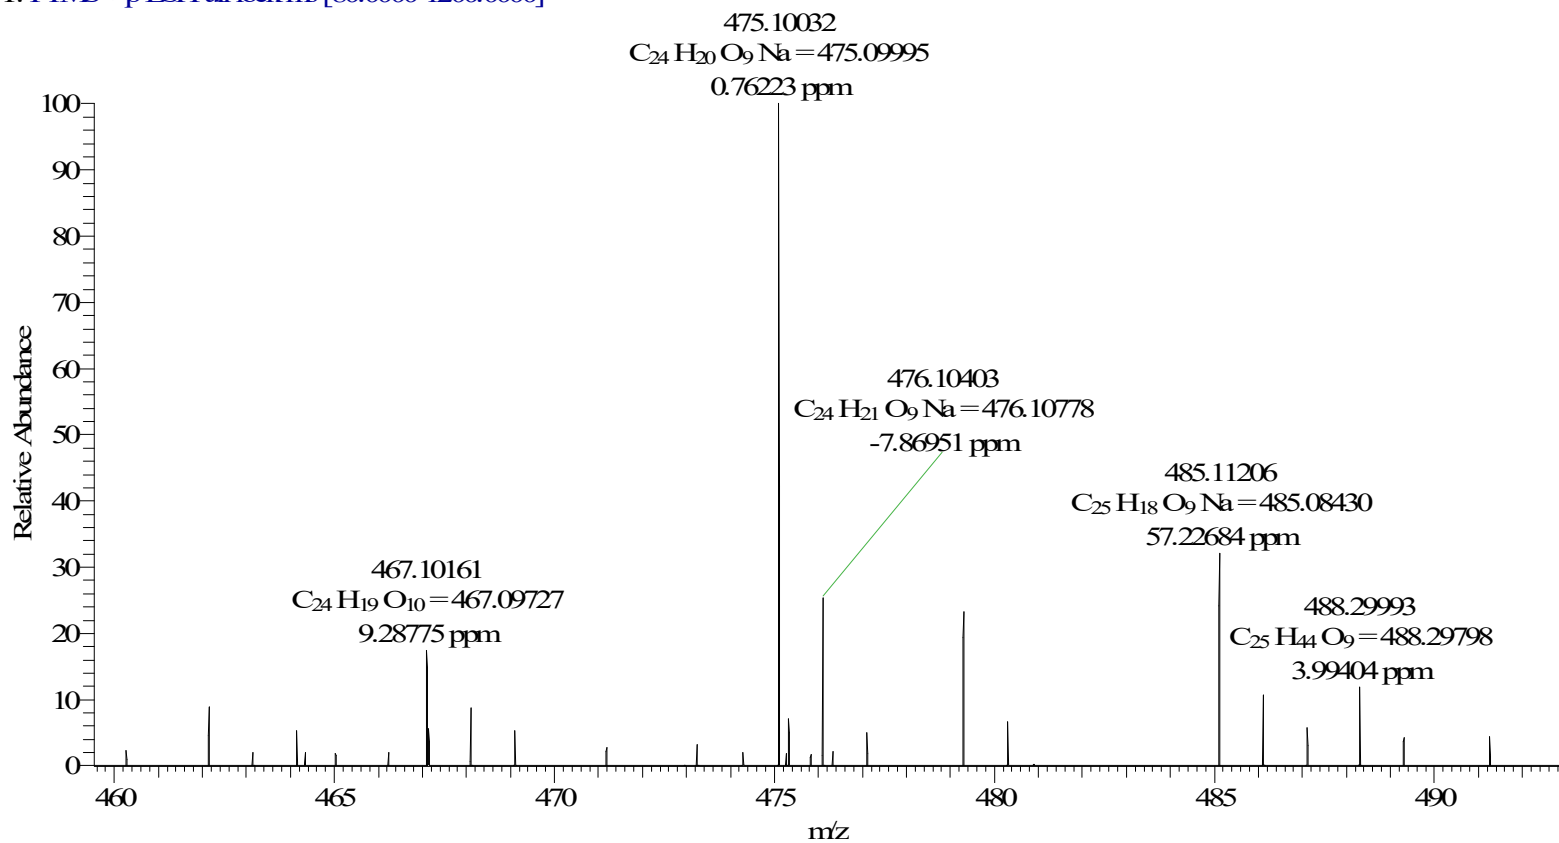

**Figure S4** HSQC spectrum of compound **1**

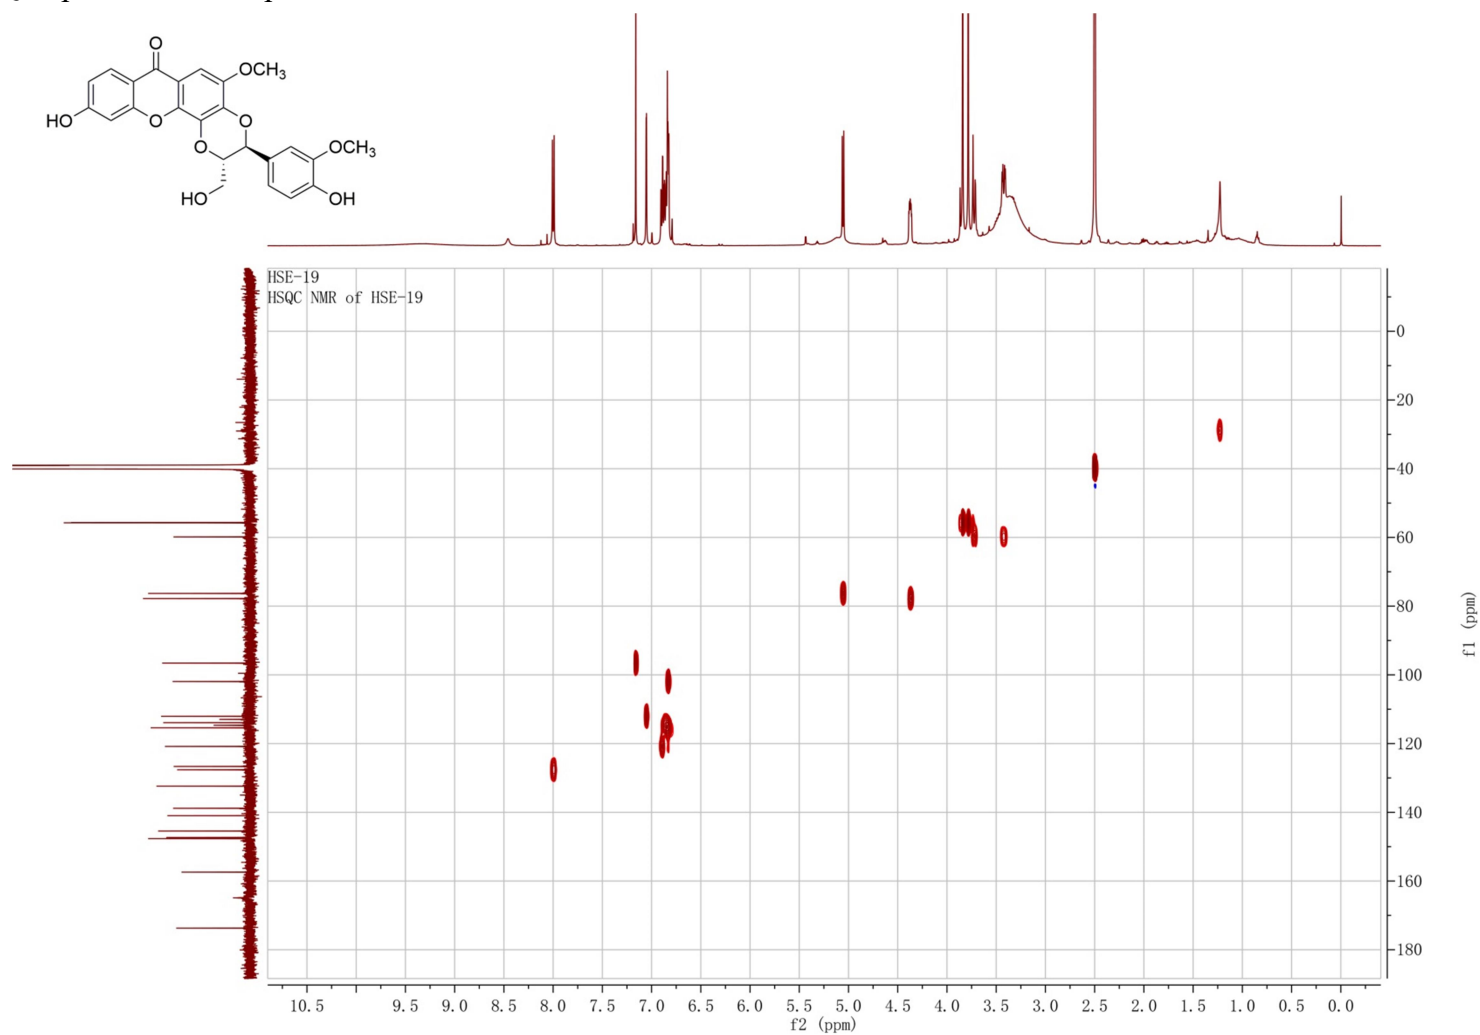

**Figure S5** HMBC spectrum of compound **1**

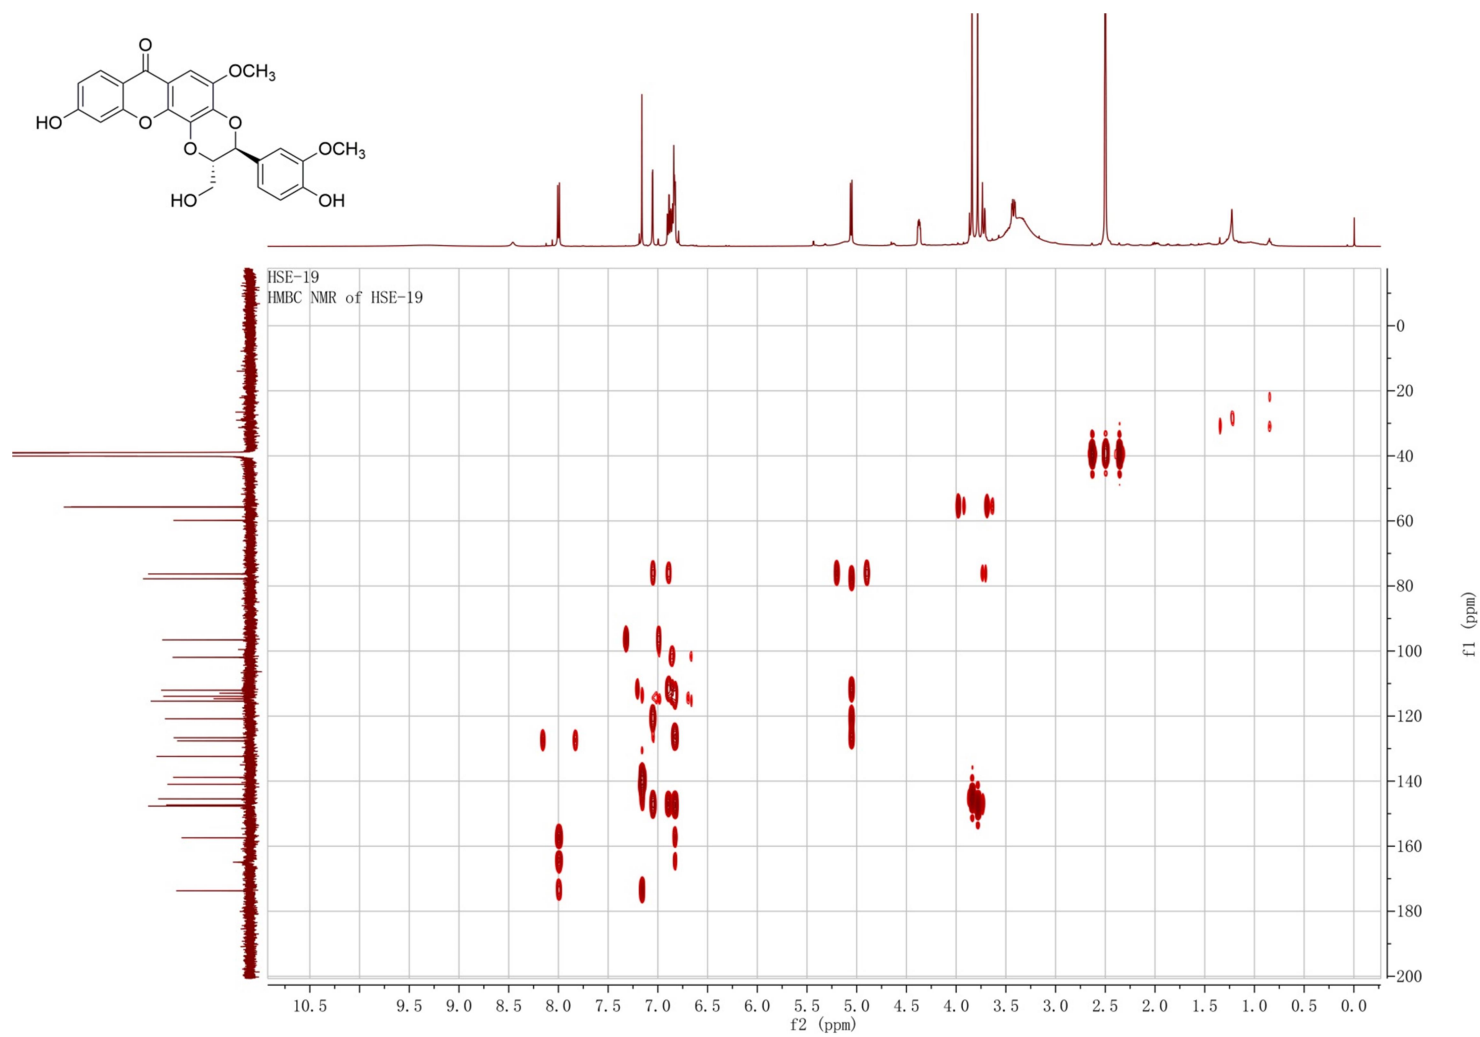

**Figure S6**  $^1\text{H}$  NMR (500 MHz,  $\text{DMSO-}d_6$ ) spectrum of compound **2**

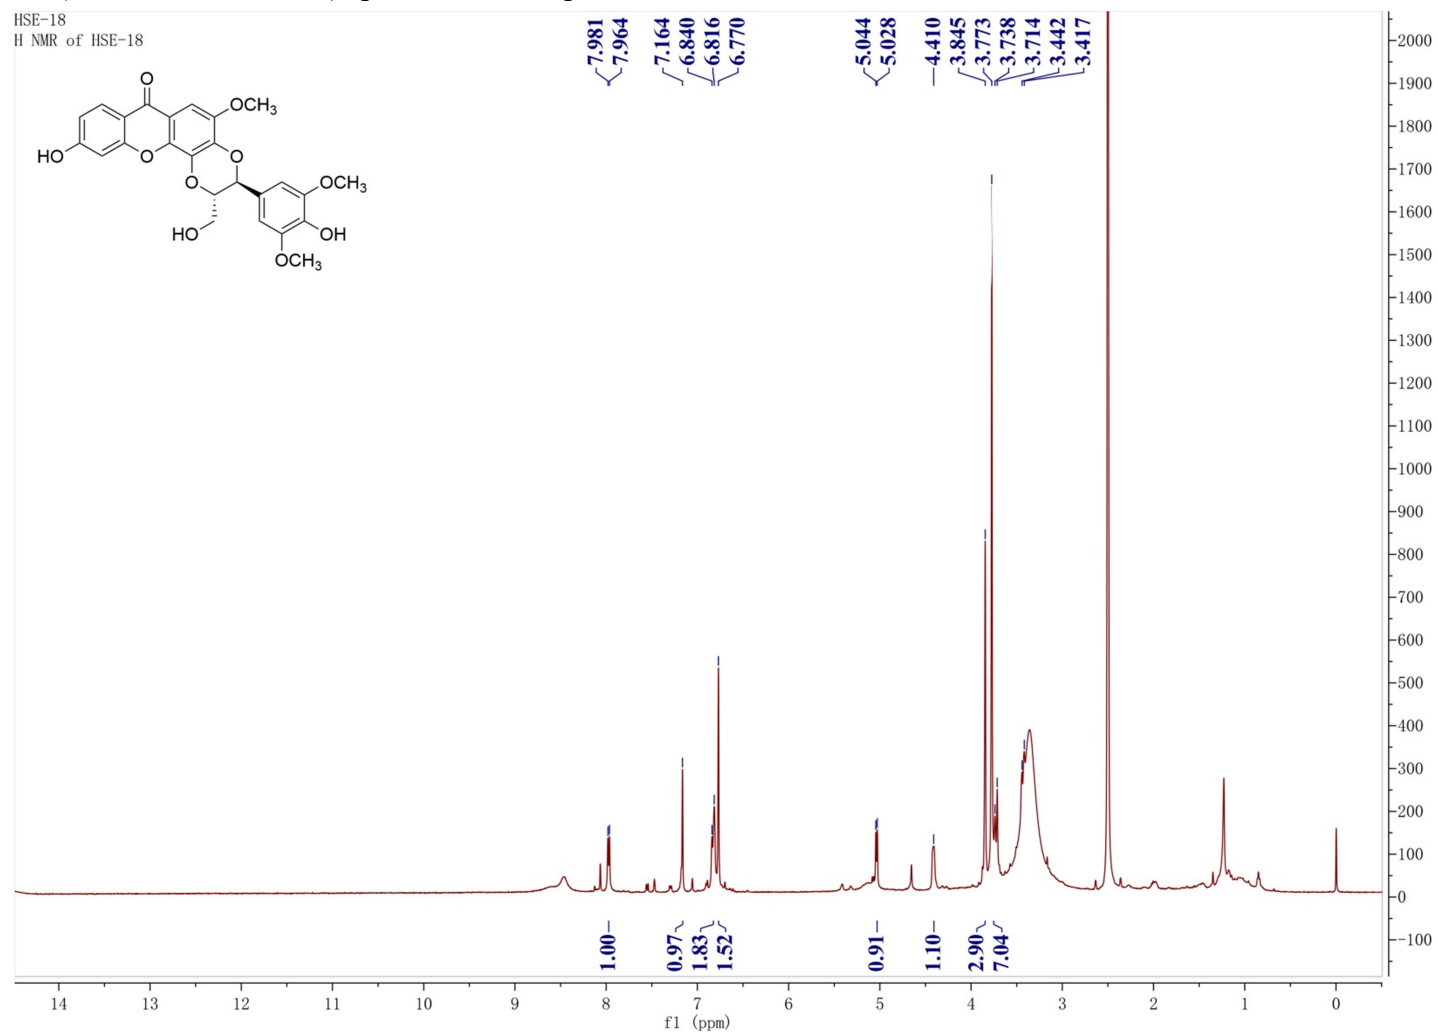

**Figure S7**  $^{13}\text{C}$  NMR (125 MHz, DMSO- $d_6$ ) spectrum of compound **2**

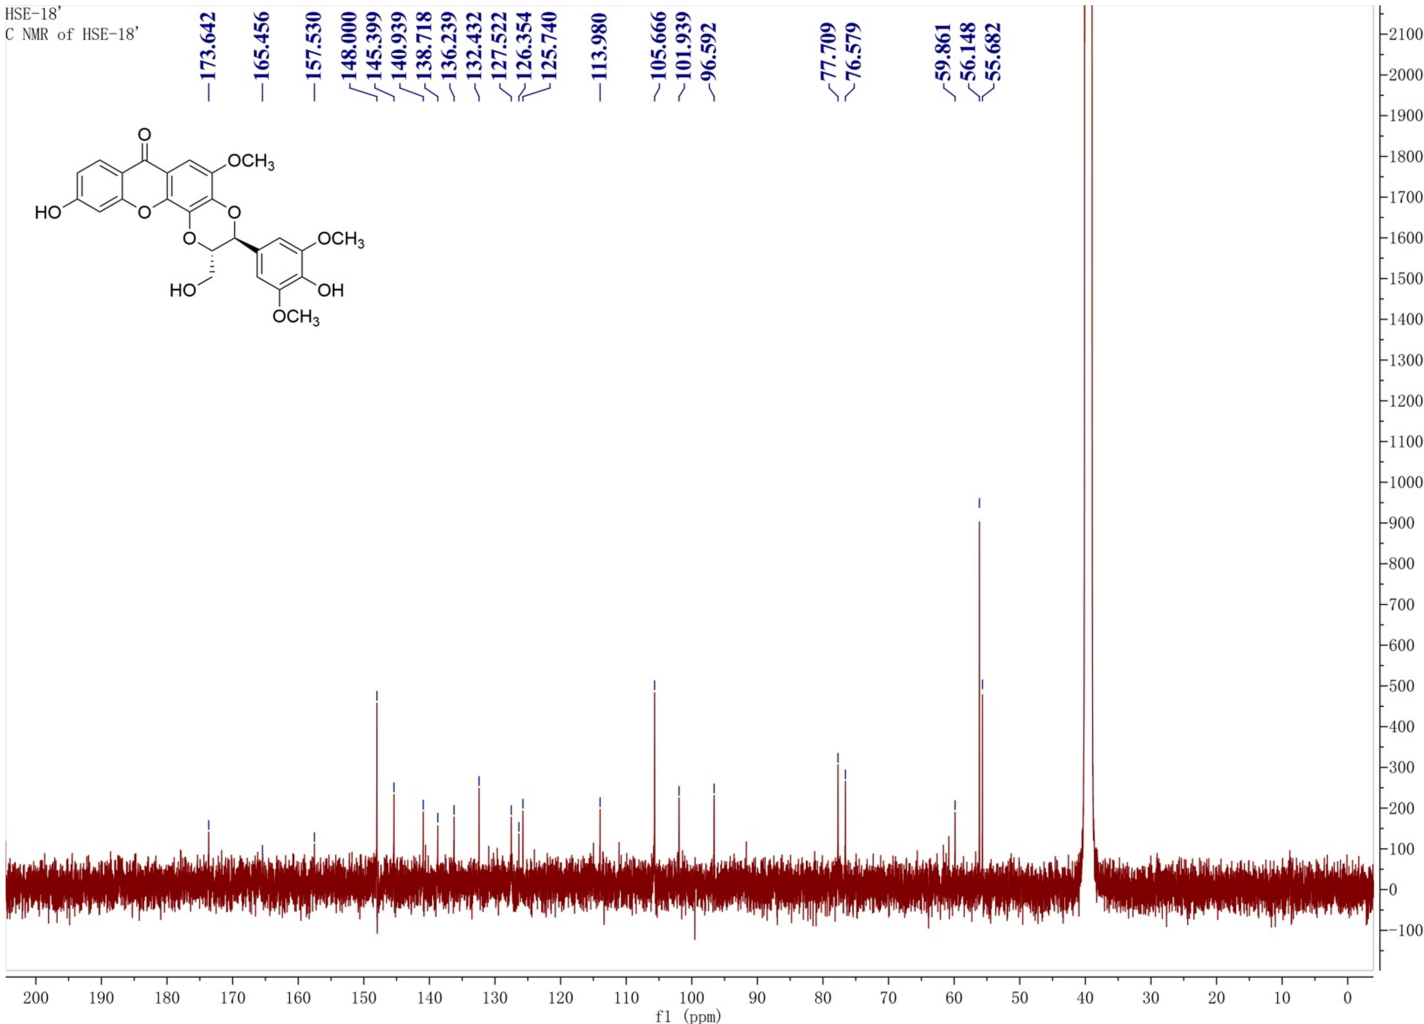

**Figure S8** HRESIMS spectrum of compound **2**

**Analysis Name:** HSE-18

**Acquisition Date:**

**20201230**

**Comment:** ESI Positive

**Operator:**

**TIPC**

1 #15-16 RT: 0.12-0.13 AV: 2 SB: 5 0.04-0.05 , 0.20-0.21 NL: 1.90E5  
T: FTMS +p ESI Full lock ms [80.0000-1200.0000]

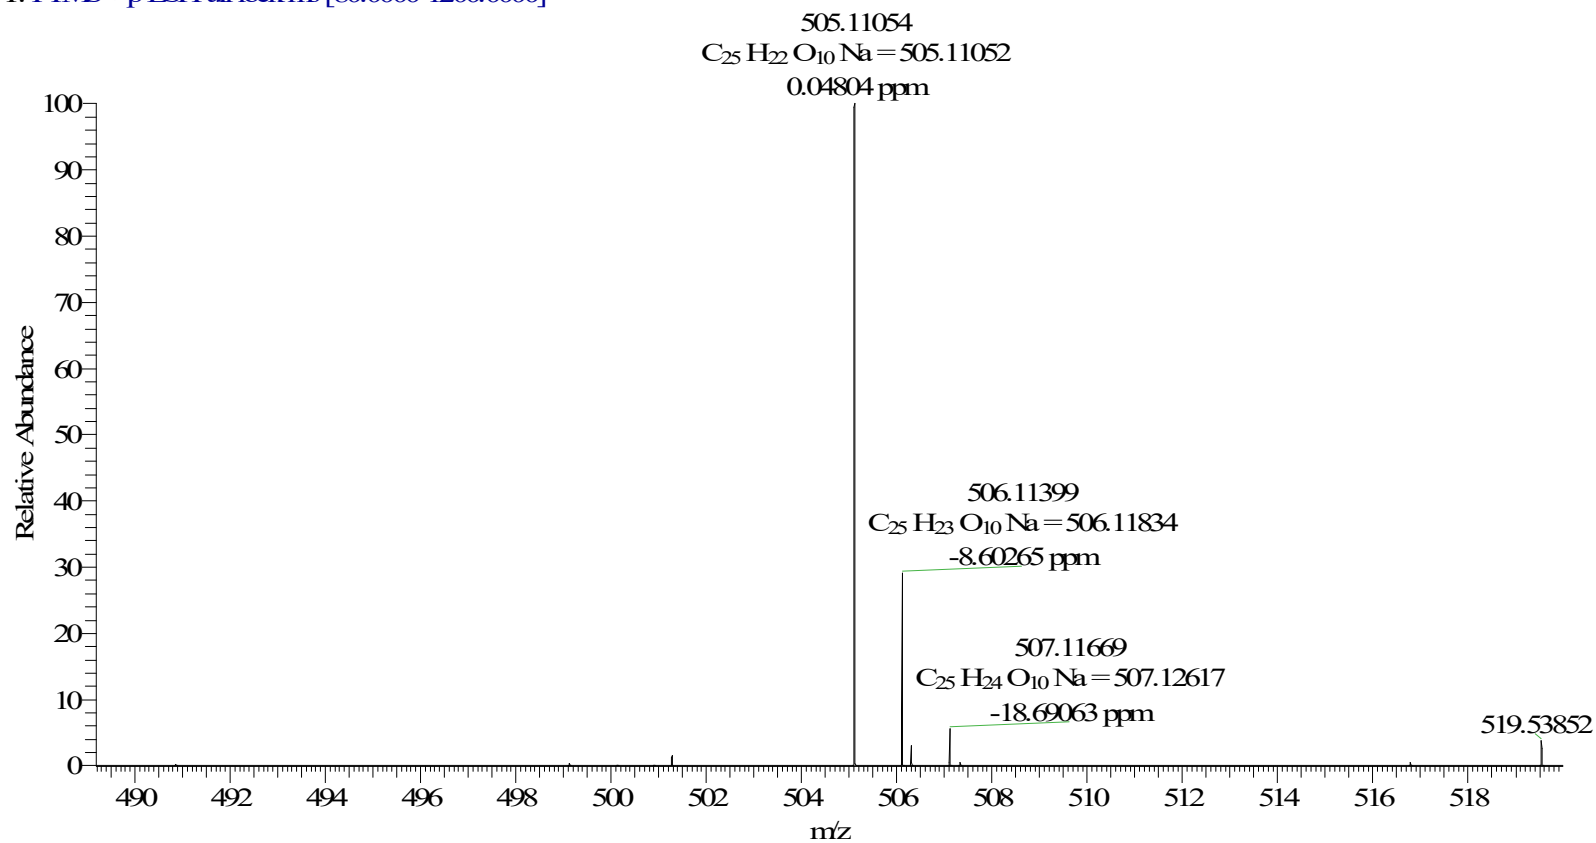

**Figure S9** HSQC spectrum of compound **2**

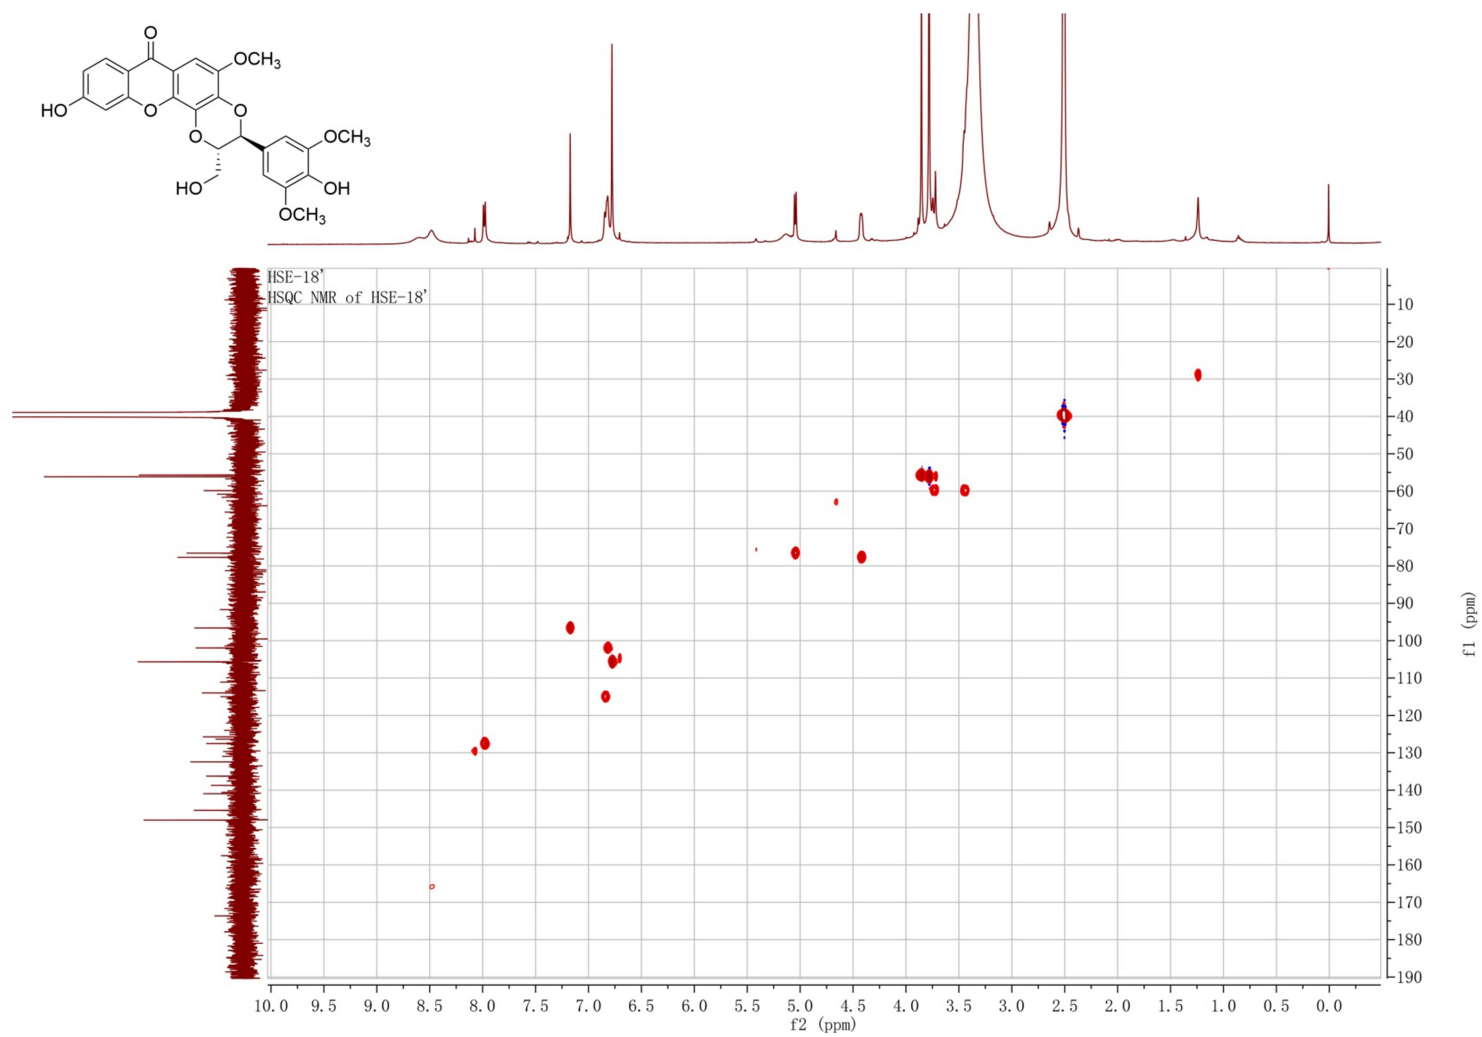

**Figure S10** HMBC spectrum of compound **2**

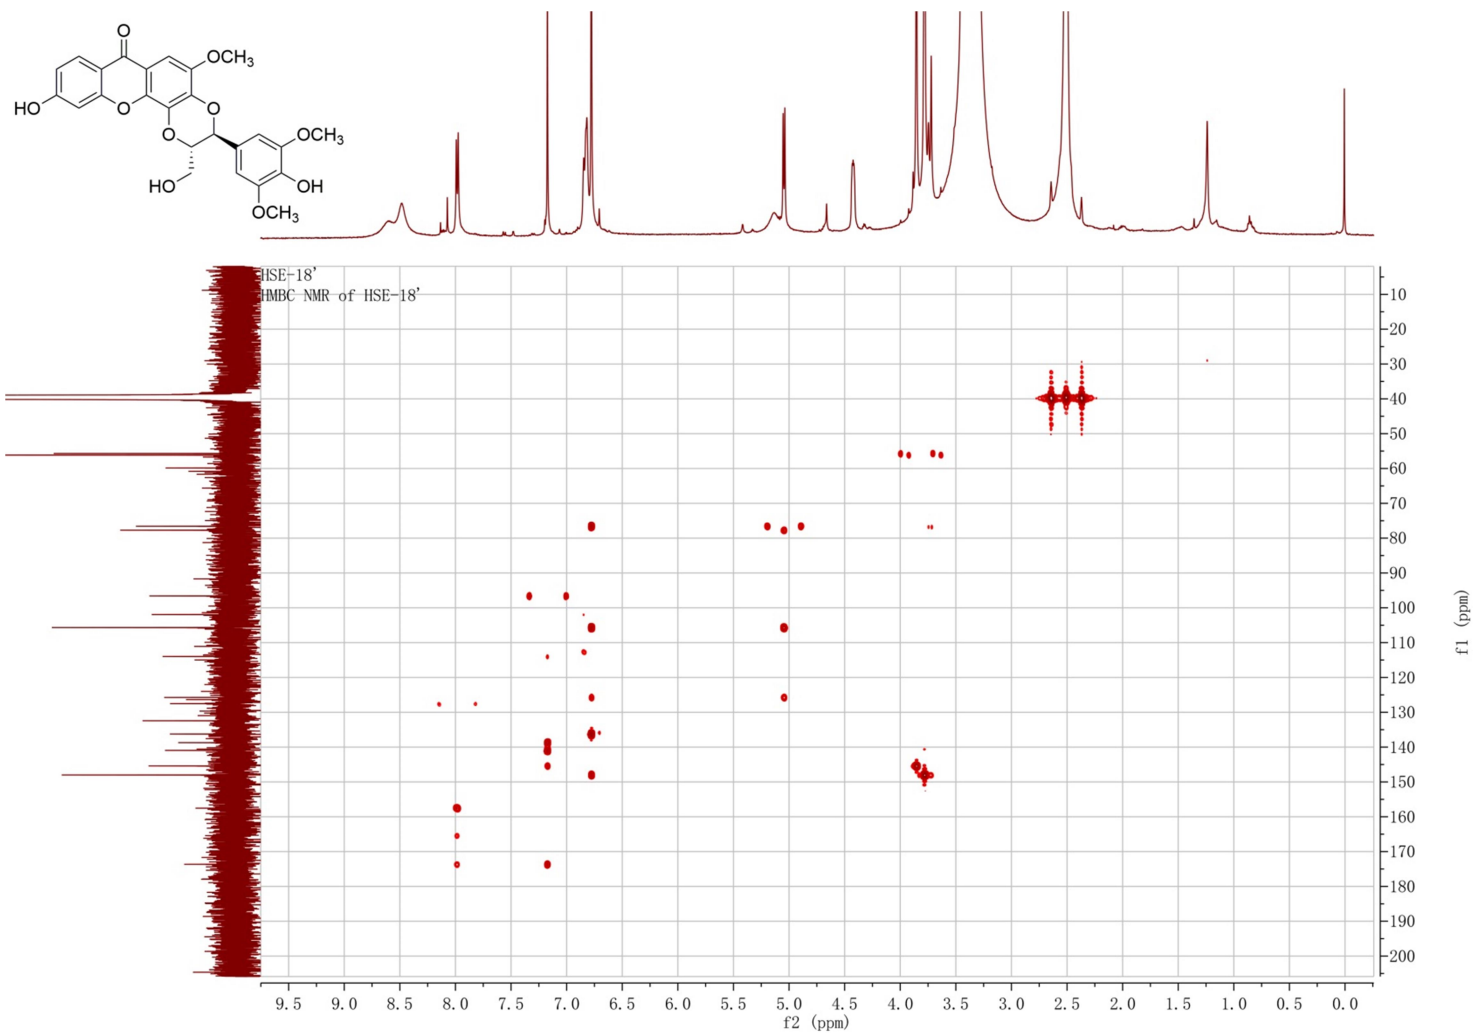



**Figure S11**  $^1\text{H}$  NMR (500 MHz,  $\text{DMSO}-d_6$ ) spectrum of compound **7**

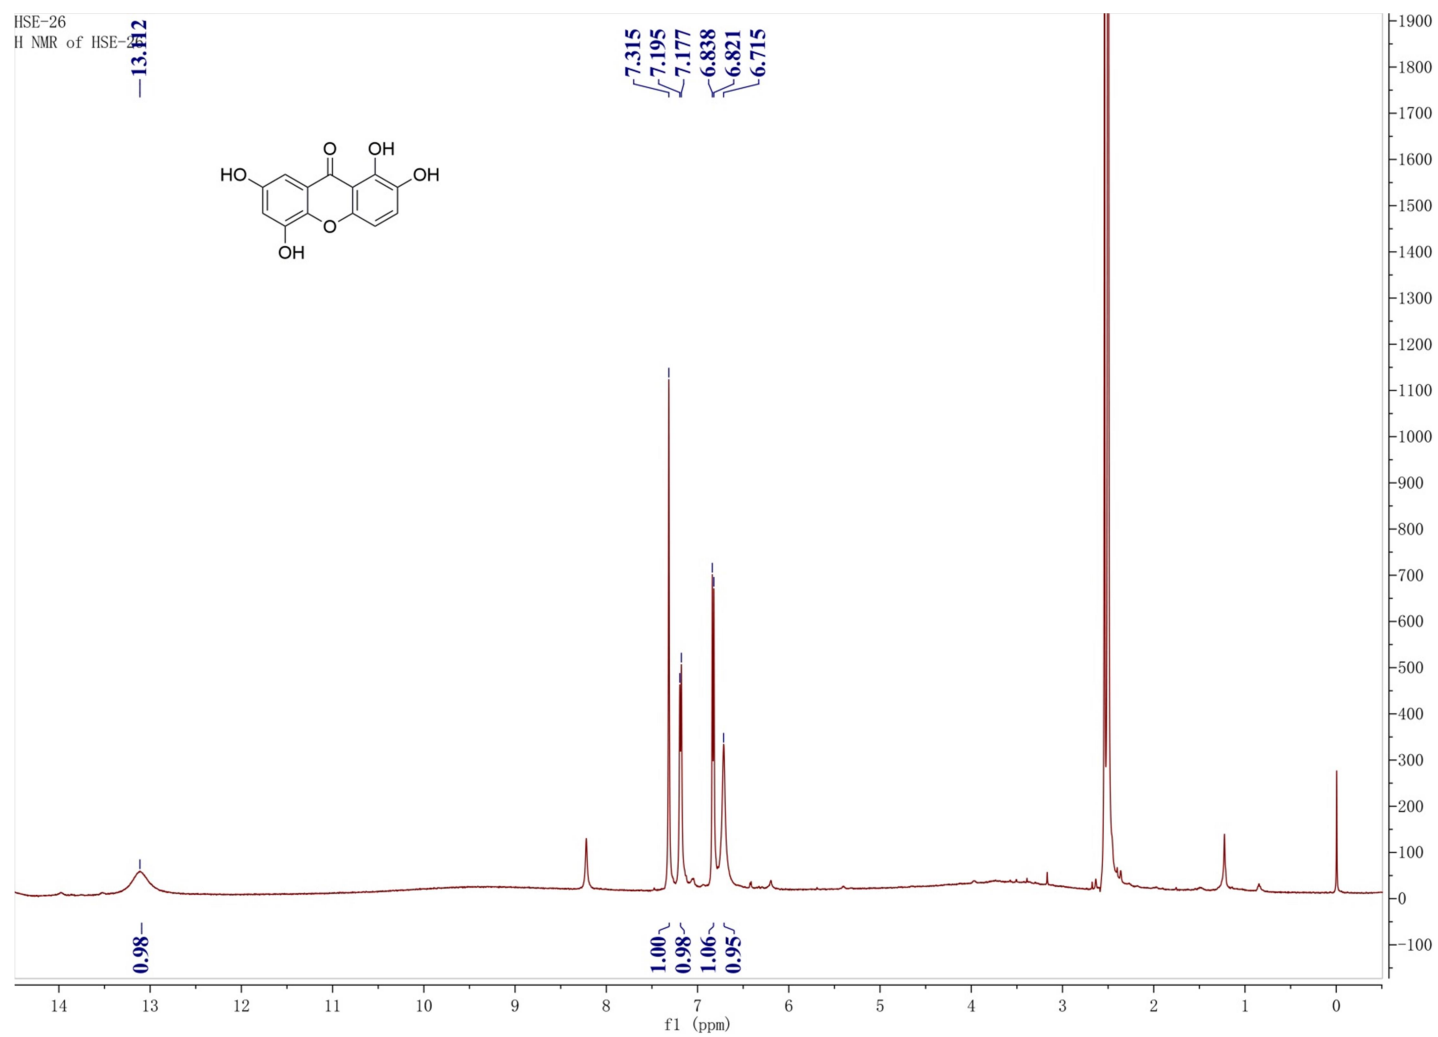

**Figure S12**  $^{13}\text{C}$  NMR (125 MHz,  $\text{DMSO-}d_6$ ) spectrum of compound 7

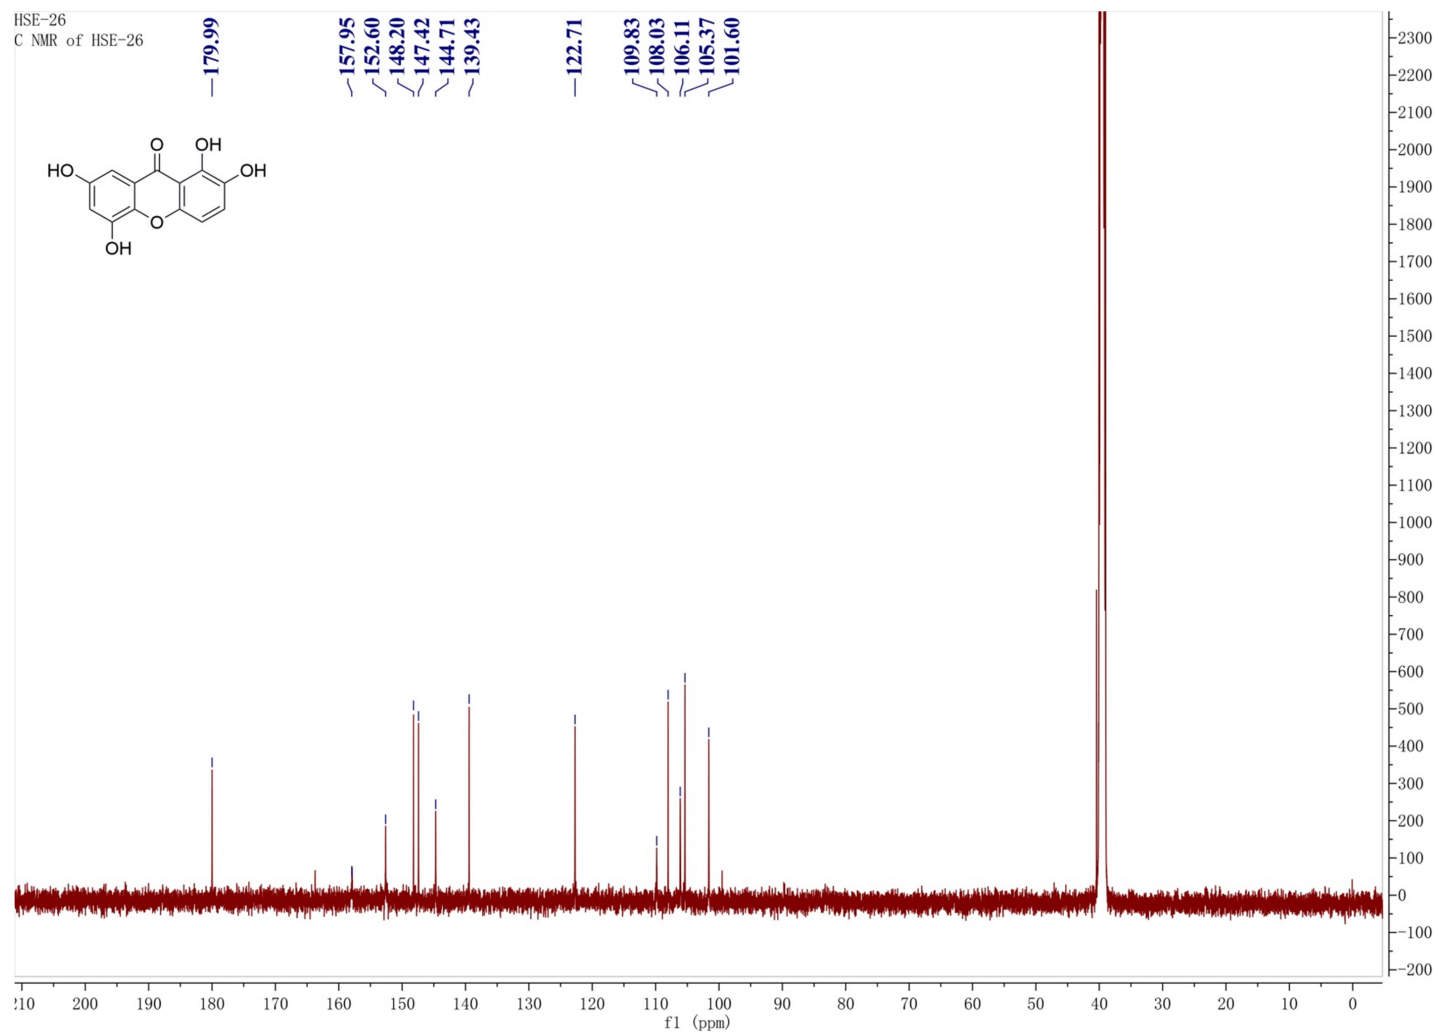

Figure S13 HRESIMS spectrum of compound 7

Analysis Name: HSE-26

Acquisition Date:

20201230

Comment: ESI Negative

Operator:

TIPC

4#13 RT: 0.15 AV: 1 NL: 6.30E6  
T: FTMS - p ESI Full ms [50.0000-750.0000]

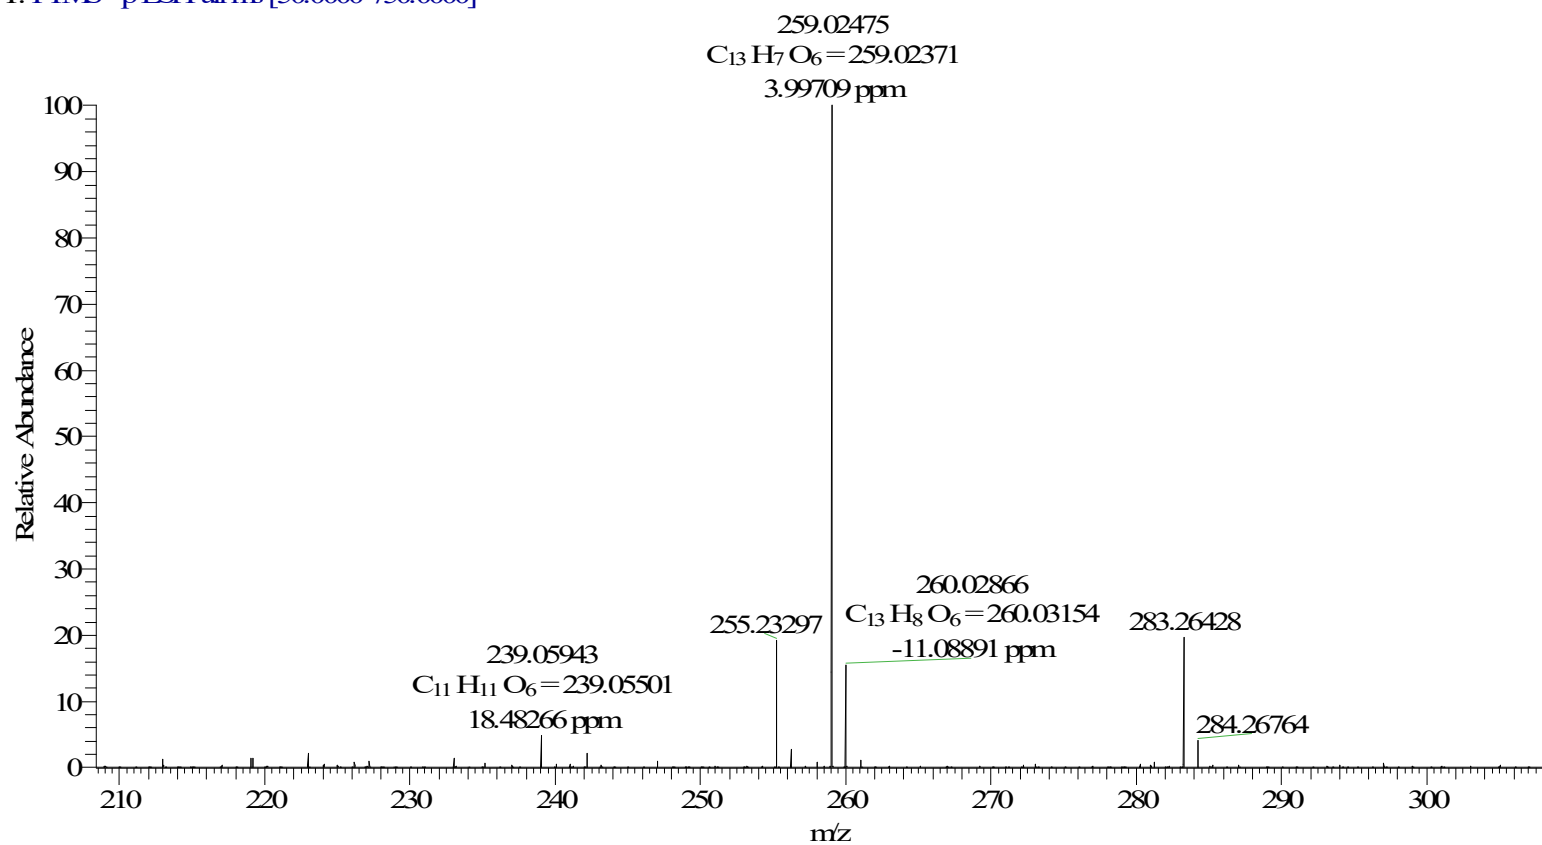

**Figure S14** HSQC spectrum of compound **7**

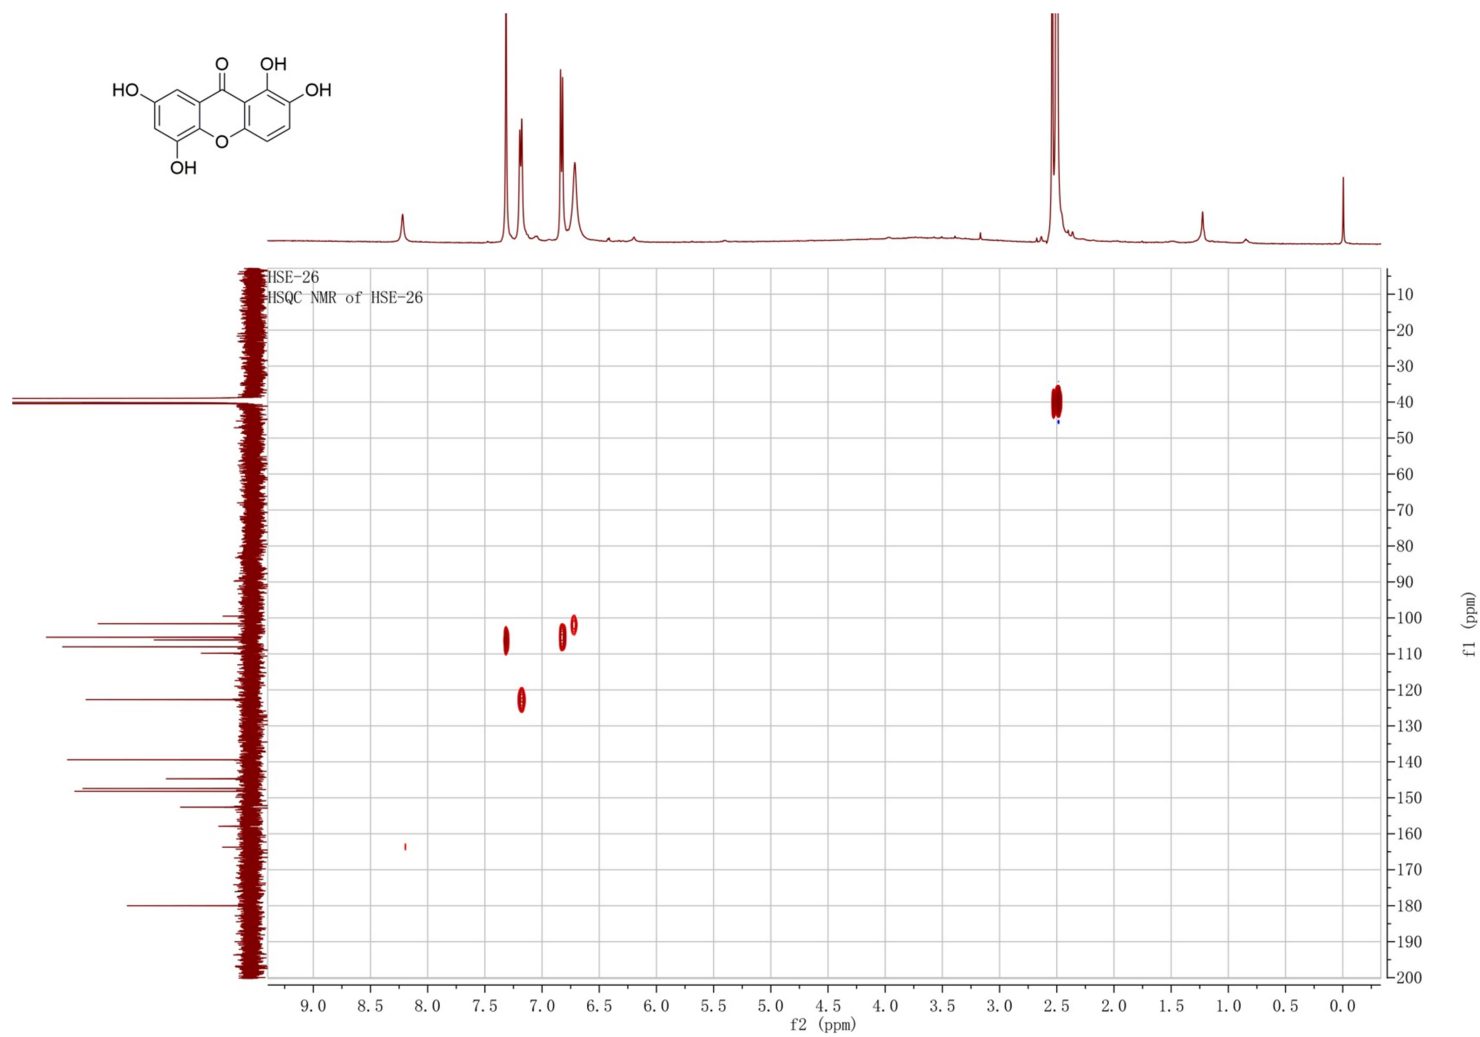

**Figure S15** HMBC spectrum of compound **7**

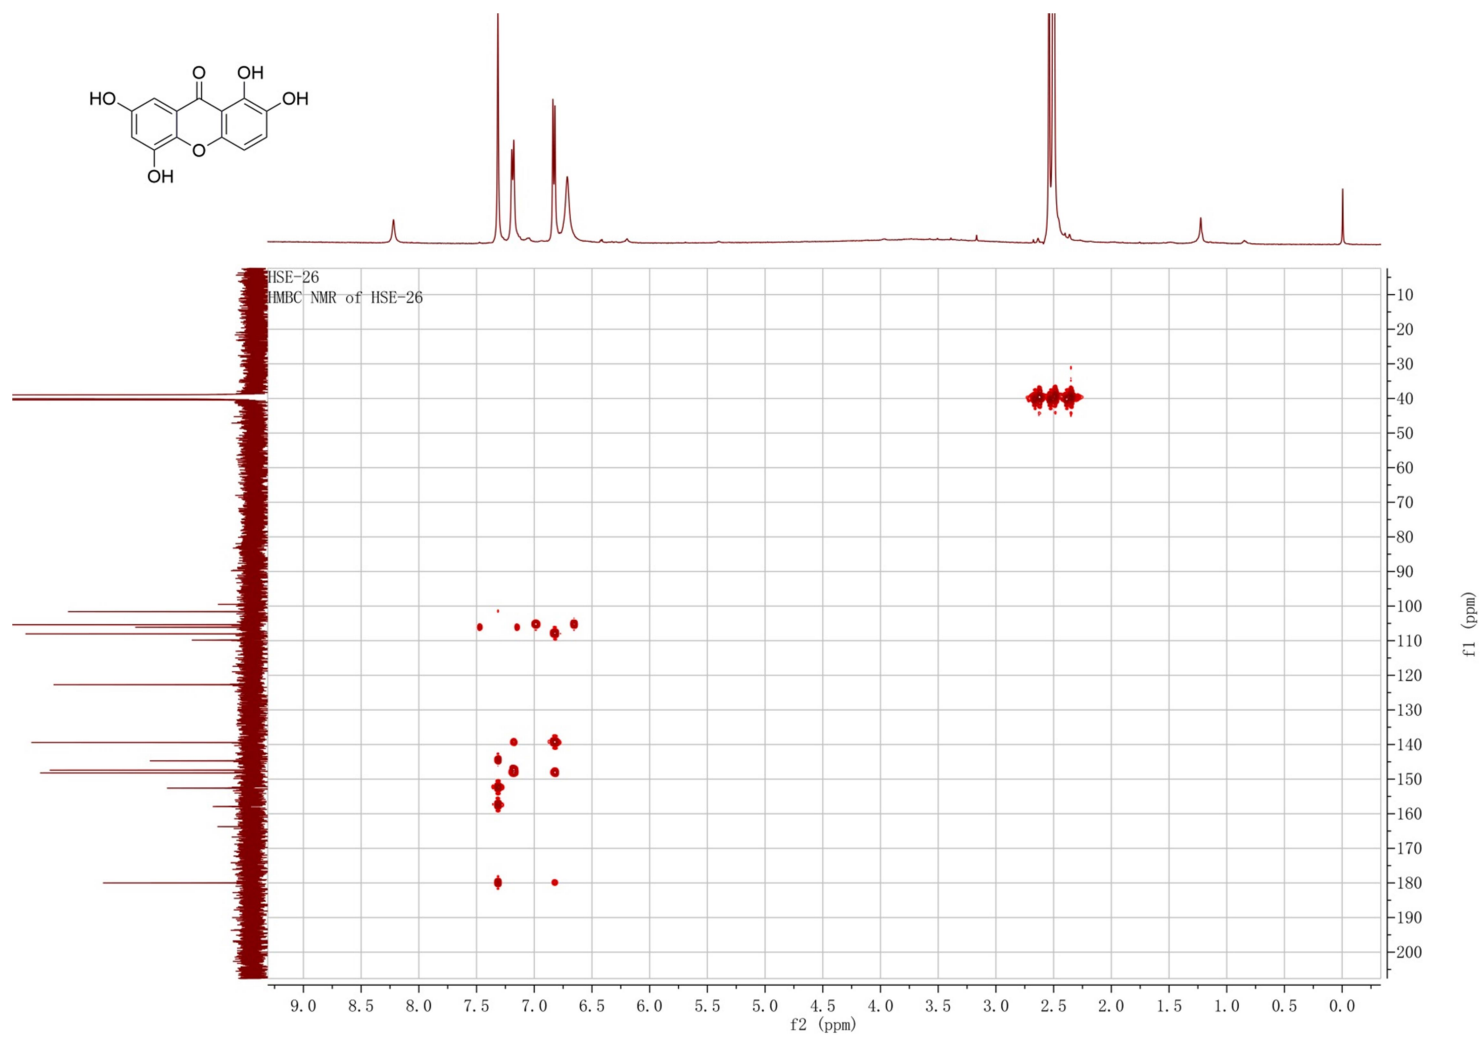

**Figure S16**  $^1\text{H}$  NMR (500 MHz,  $\text{DMSO}-d_6$ ) spectrum of compound **8**

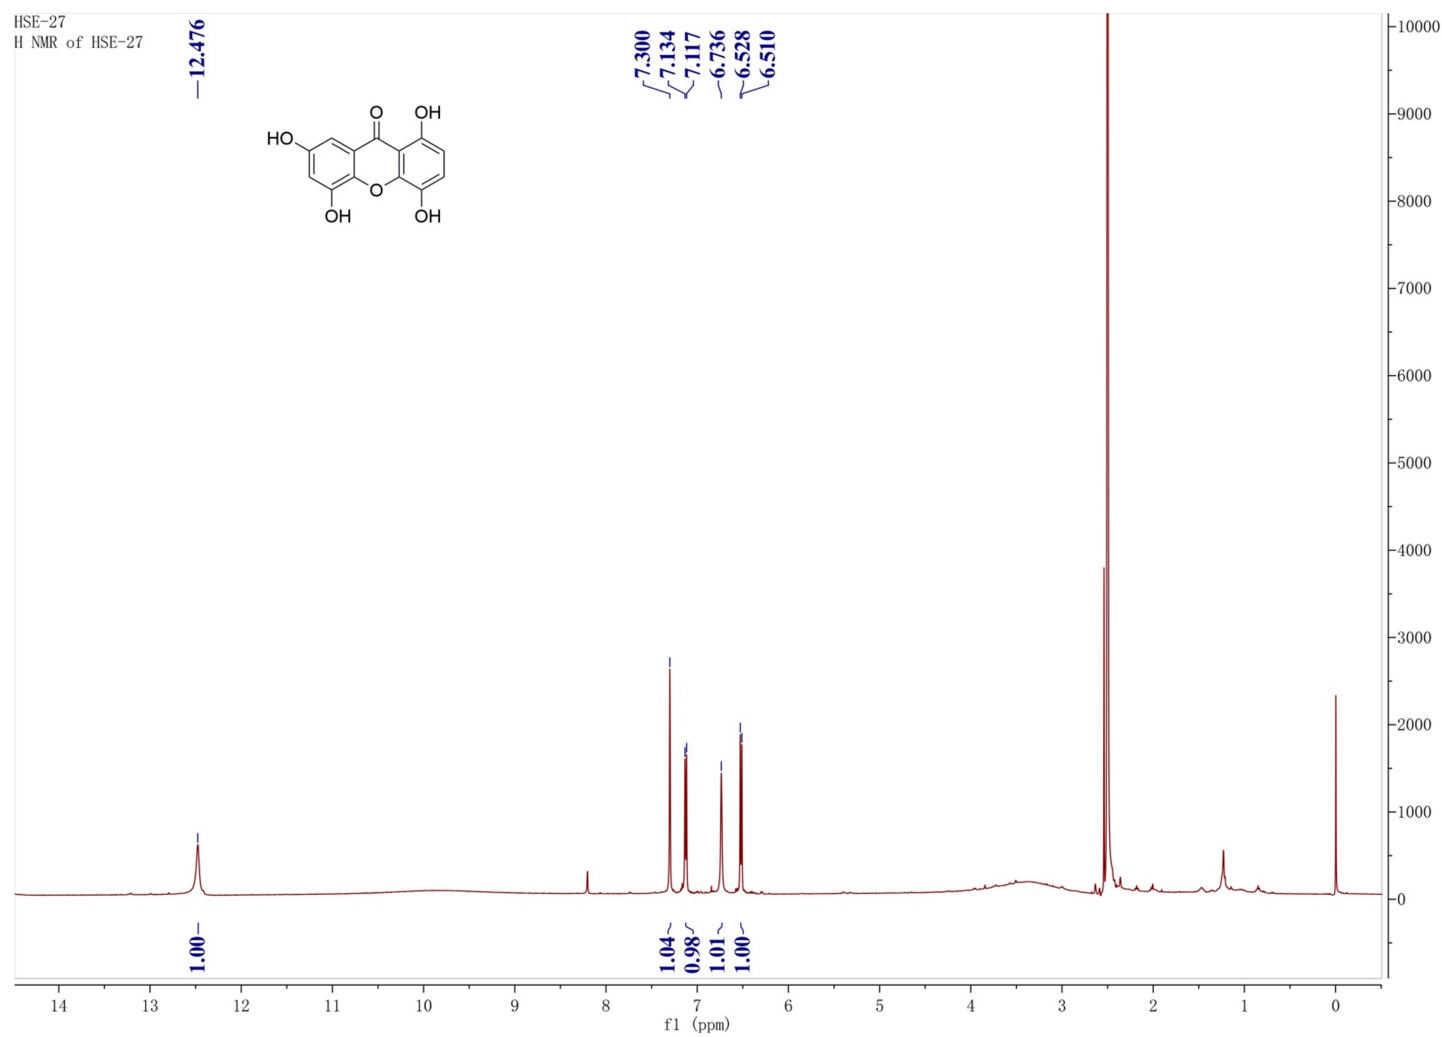

**Figure S17**  $^{13}\text{C}$  NMR (125 MHz,  $\text{DMSO}-d_6$ ) spectrum of compound **8**

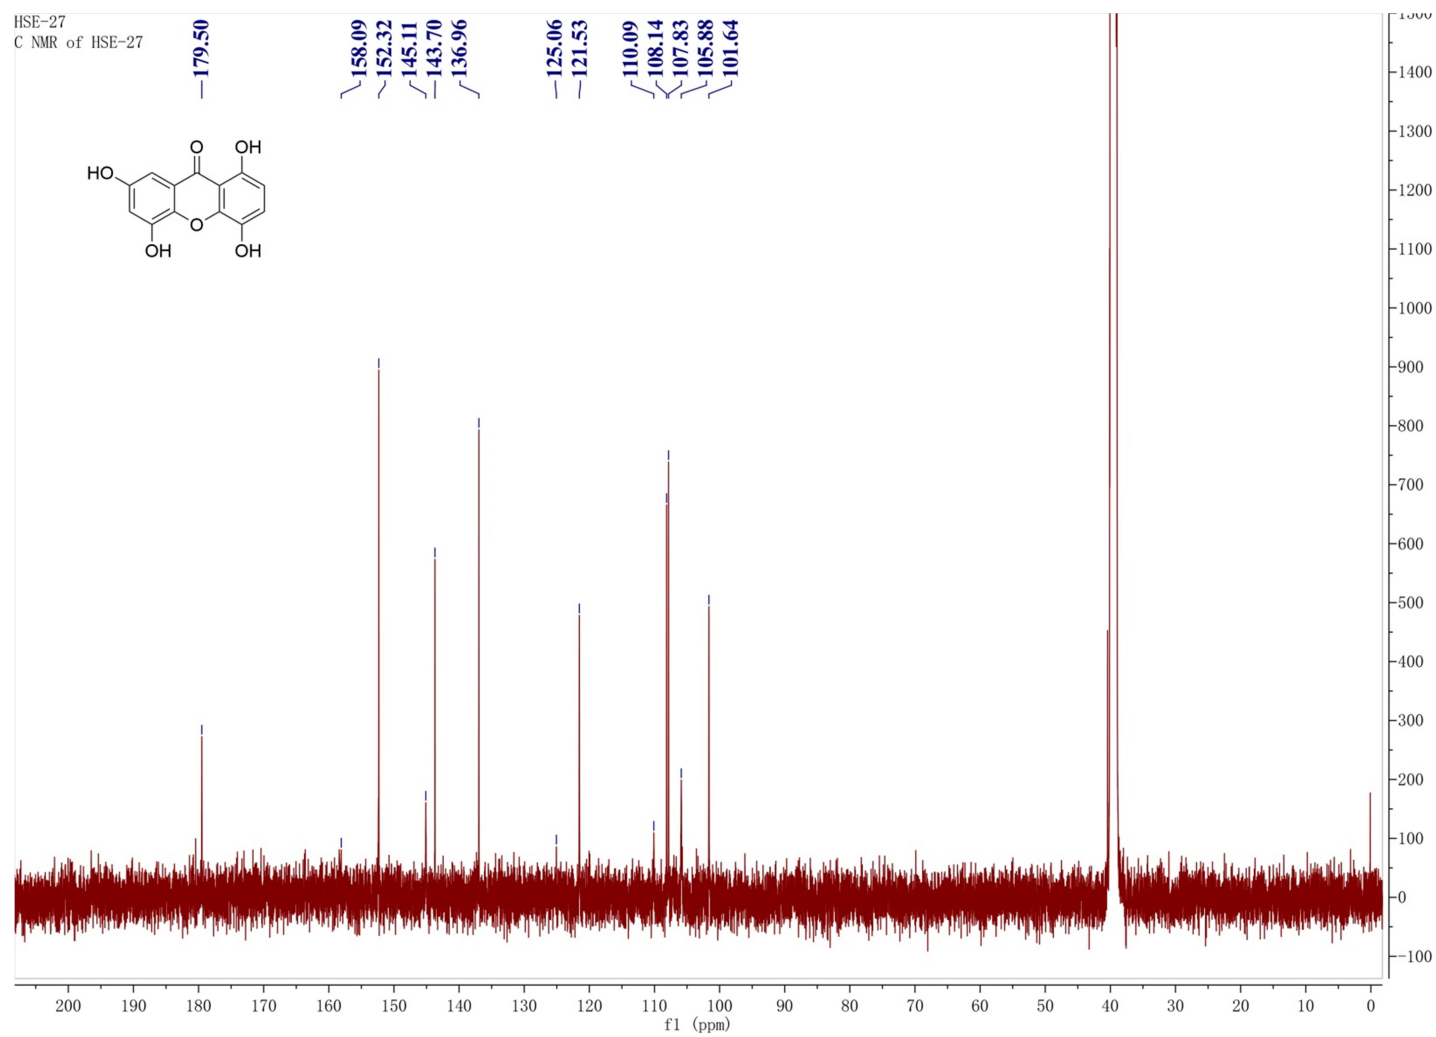

Figure S18 HRESIMS spectrum of compound 8

Analysis Name: HSE-27

Acquisition Date:

20201230

Comment: ESI Negative

Operator:

TIPC

5 #11 RT: 0.13 AV: 1 SB: 1 0.05, 0.22-0.23 NL: 3.76E6  
T: FTMS - p ESI Full ms [50.0000-750.0000]

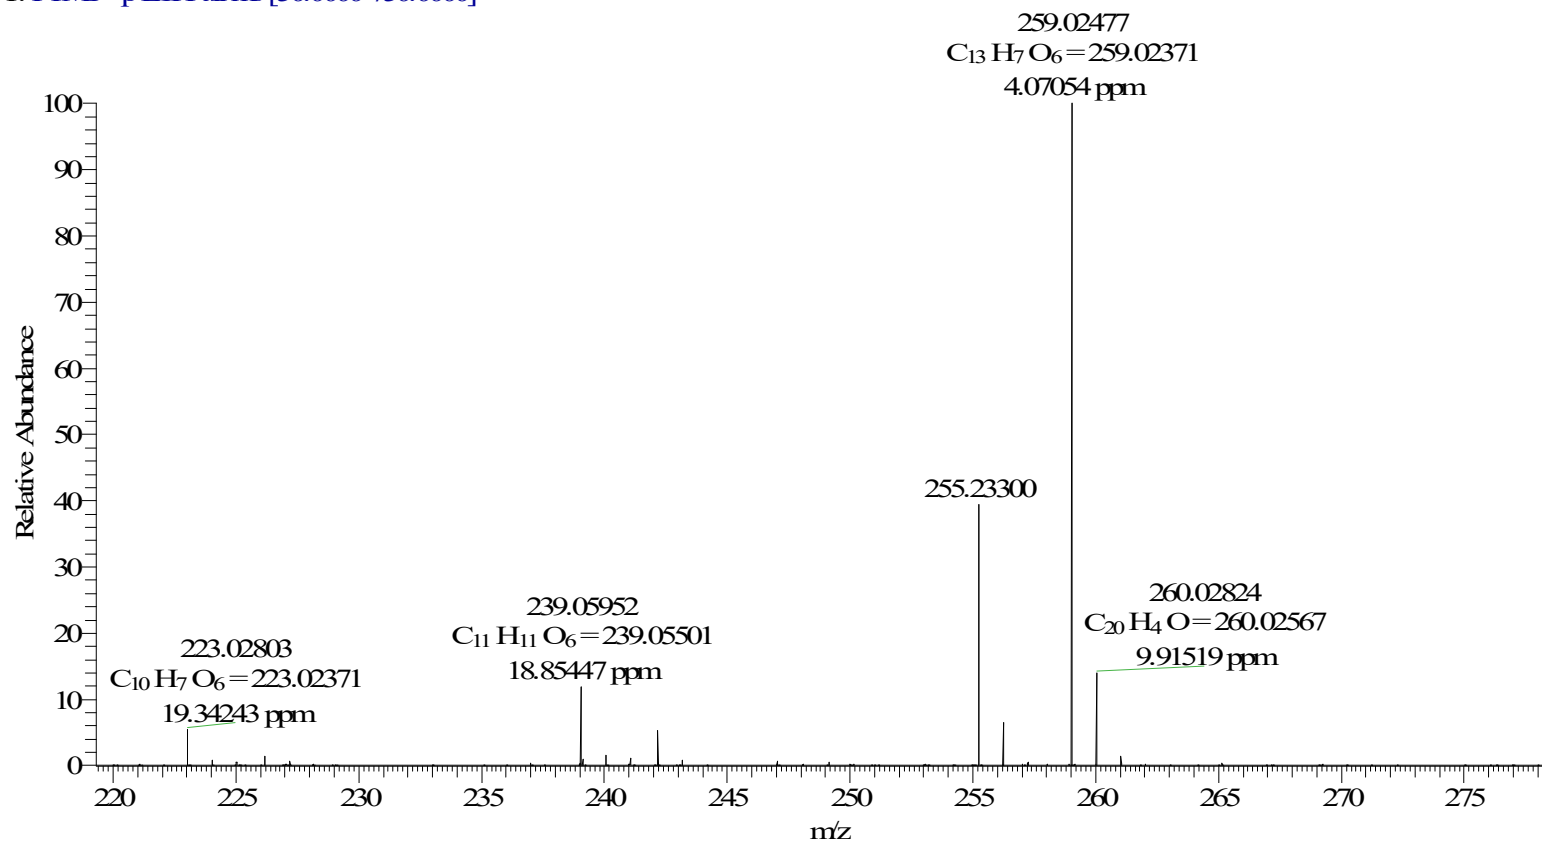



**Figure S19** HSQC spectrum of compound **8**

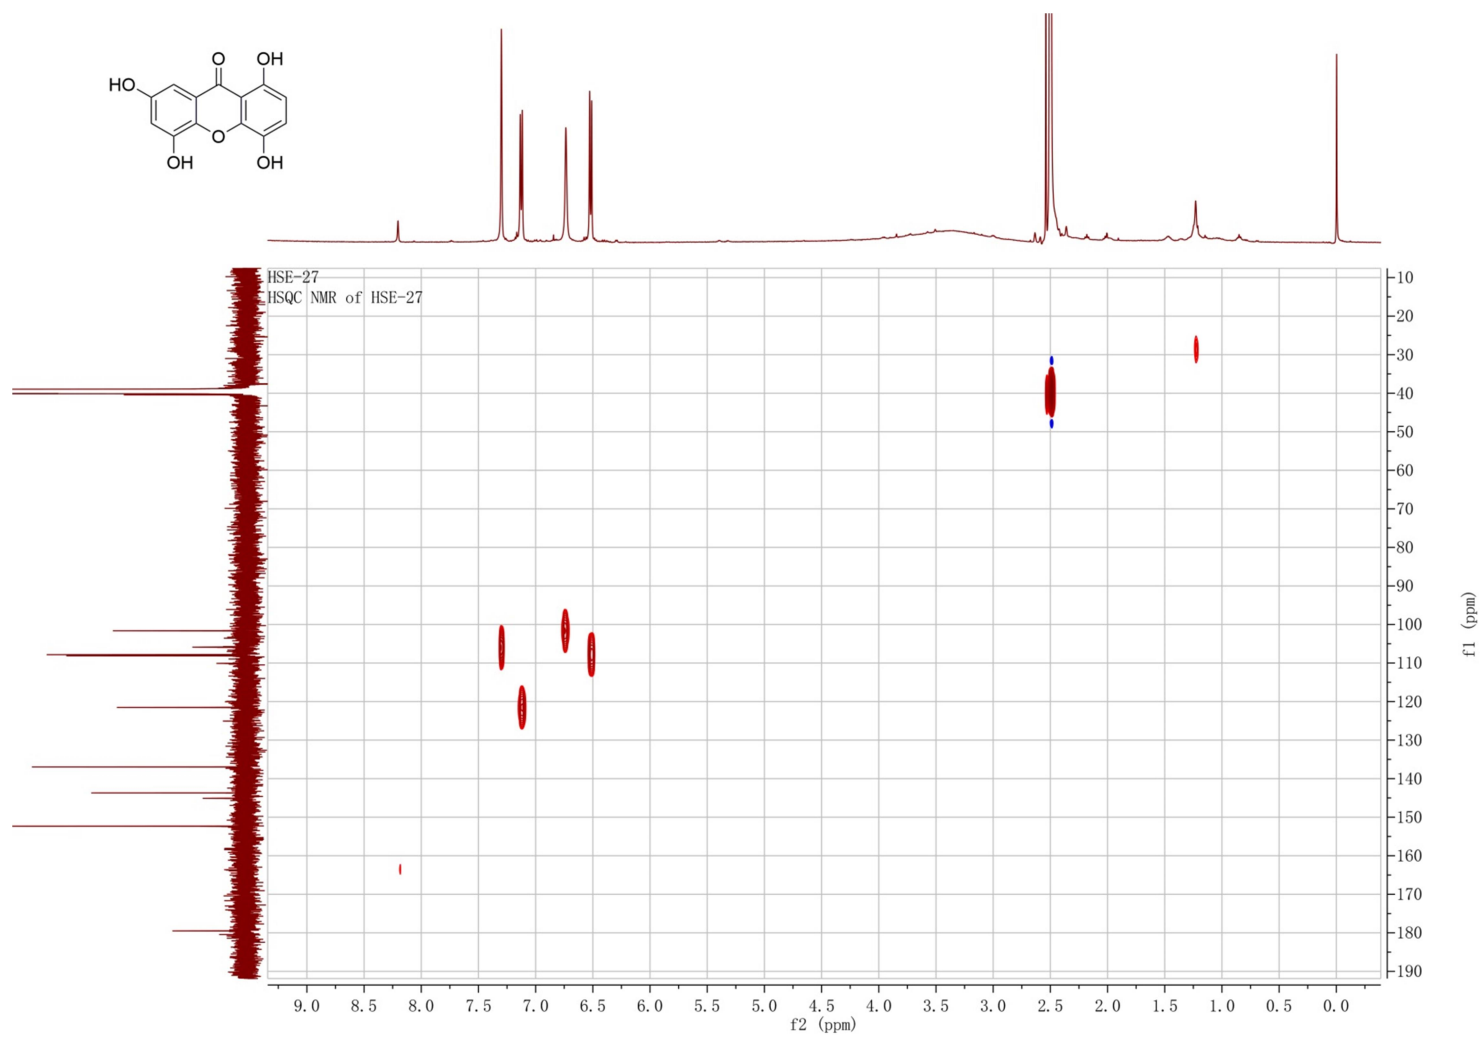

**Figure S20** HMBC spectrum of compound **8**

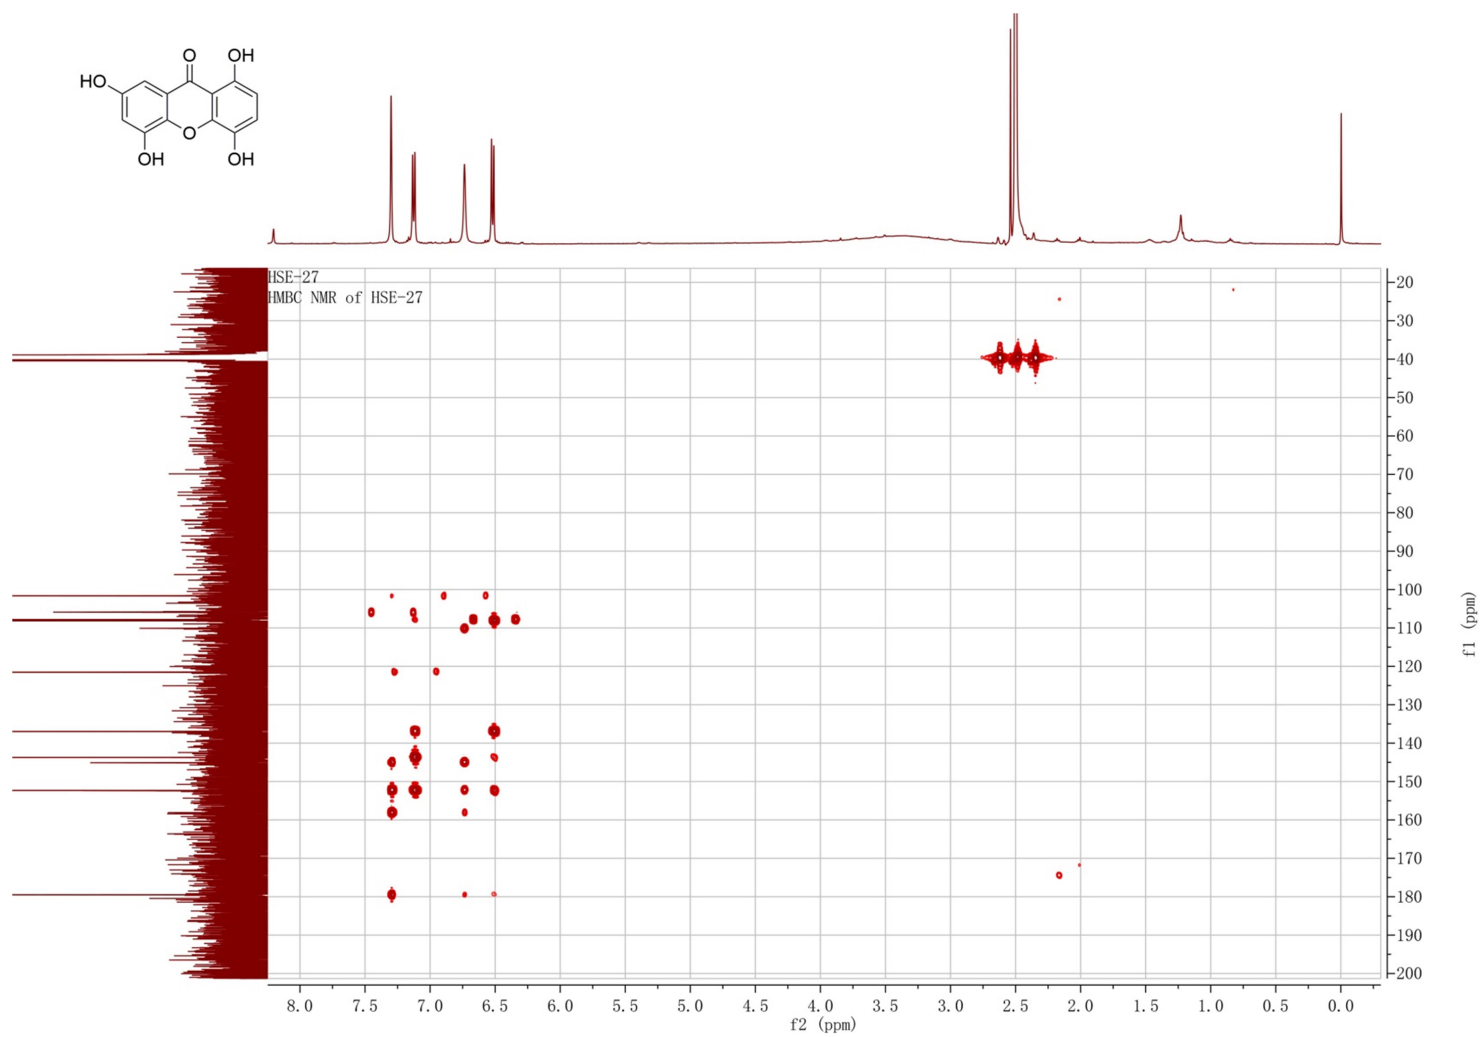

Supplement: s1 [file s1]
